# Supplementary material for: Replication of a carcinogenic nitropyrene DNA lesion by human Y-family DNA polymerase
Source: PubMed Central journal article supplement — Nucleic Acids Res. 2012 Dec 24;41(3):2060–71. doi: 10.1093/nar/gks1296 (PMC3561991; doi:10.1093/nar/gks1296), 2012-12-24
Supplement: supp_gks1296_nar-02783-m-2012-File007.pdf [file supp_gks1296_nar-02783-m-2012-File007.pdf]

Supplementary figure

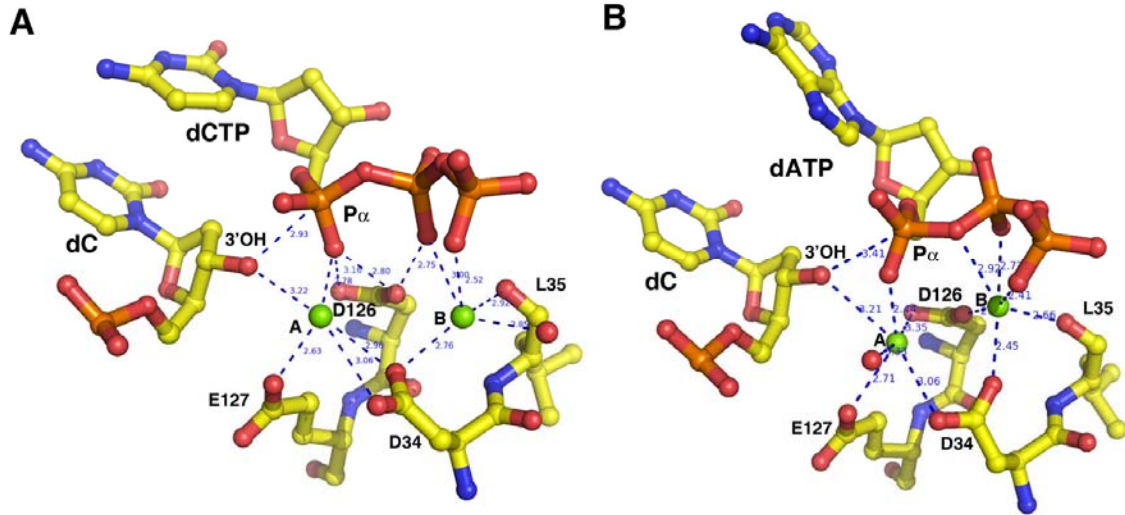

Figure S1 Close-Up Views of the active sites in the APG-dCTP (A) and APG-dATP (B) complexes. The distances for metal coordinating and between the 3'OH of the primer to the  $P_{\alpha}$  atom of dNTP are labeled. The divalent cations ( $Mg^{2+}$ ) are in green.
